# Supplementary material for: Enzymatic waterborne polyurethane towards a robust and environmentally friendly anti-biofouling coating
Source: Royal Society of Chemistry journal article supplement (doi:10.1039/c6ra04583a), 2016-01-01
Supplement: c6ra04583a1.pdf [file c6ra04583a1.pdf]

## **Electronic Supplementary Information (ESI) for**

### **Enzymatic waterborne polyurethane towards robust and environmentally friendly anti-biofouling coating**

Kai Liu<sup>a,b</sup>, Zhiguo Su<sup>a</sup>, Shida Miao<sup>a</sup>, Guanghui Ma<sup>a</sup> and Songping Zhang<sup>a\*</sup>

a. National Key Laboratory of Biochemical Engineering, Institute of Process Engineering, Chinese Academy of Sciences, Beijing 100190, PR China.

b. University of Chinese Academy of Sciences, Beijing, 100049, PR China.

**Corresponding author:** [spzhang@ipe.ac.cn](mailto:spzhang@ipe.ac.cn)

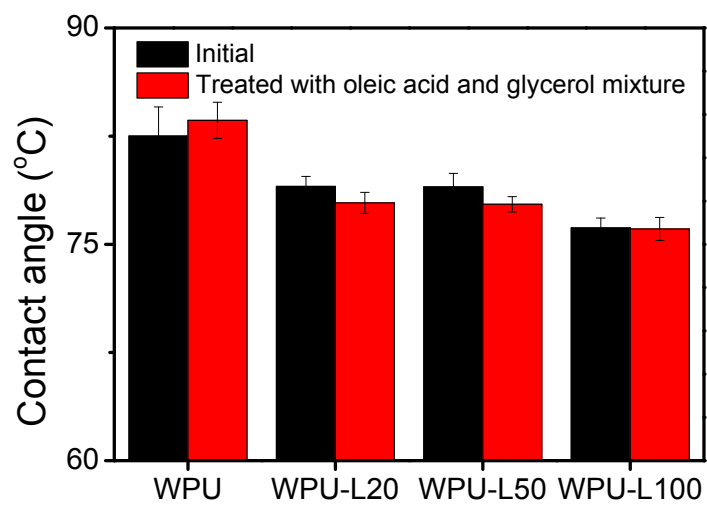

Fig. S1. Contact angle of WPU-L coatings containing different content of CALB after spread with mixture of oleic acid and glycerol (1:1, v/v).
